# Supplementary material
Source: PubMed Central journal article supplement (PMC7132605)
Supplement: mmc1.pdf [file mmc1.pdf]

**YMTHE, Volume 28**

**Supplemental Information**

**Type 1 Interferon Responses Underlie**

**Tumor-Selective Replication of Oncolytic**

**Measles Virus**

**Sarah Aref, Anna Z. Castleton, Katharine Bailey, Richard Burt, Aditi Dey, Daniel Leongamornlert, Rachel J. Mitchell, Dina Okasha, and Adele K. Fielding**

Supplemental Figures:

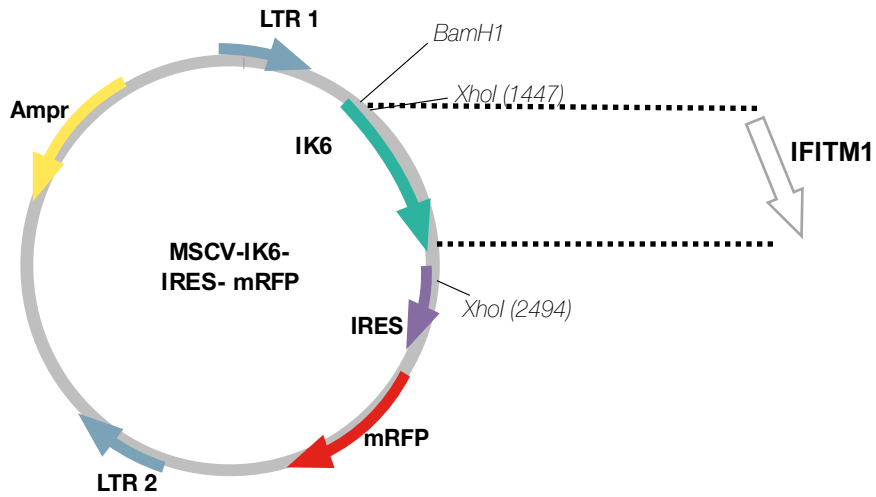

**Figure S1 Schematic diagram of construction of MSV-IFITM1-IRES-mRFP.** LTR= long terminal repeat; Ampr= ampicillin resistance; MSCV= murine stem cell virus; IRES=internal ribosome entry site; mRFP= monomeric red fluorescent protein; IK6= ikarus gene. BamH1 and XhoI are restriction sites.

**A**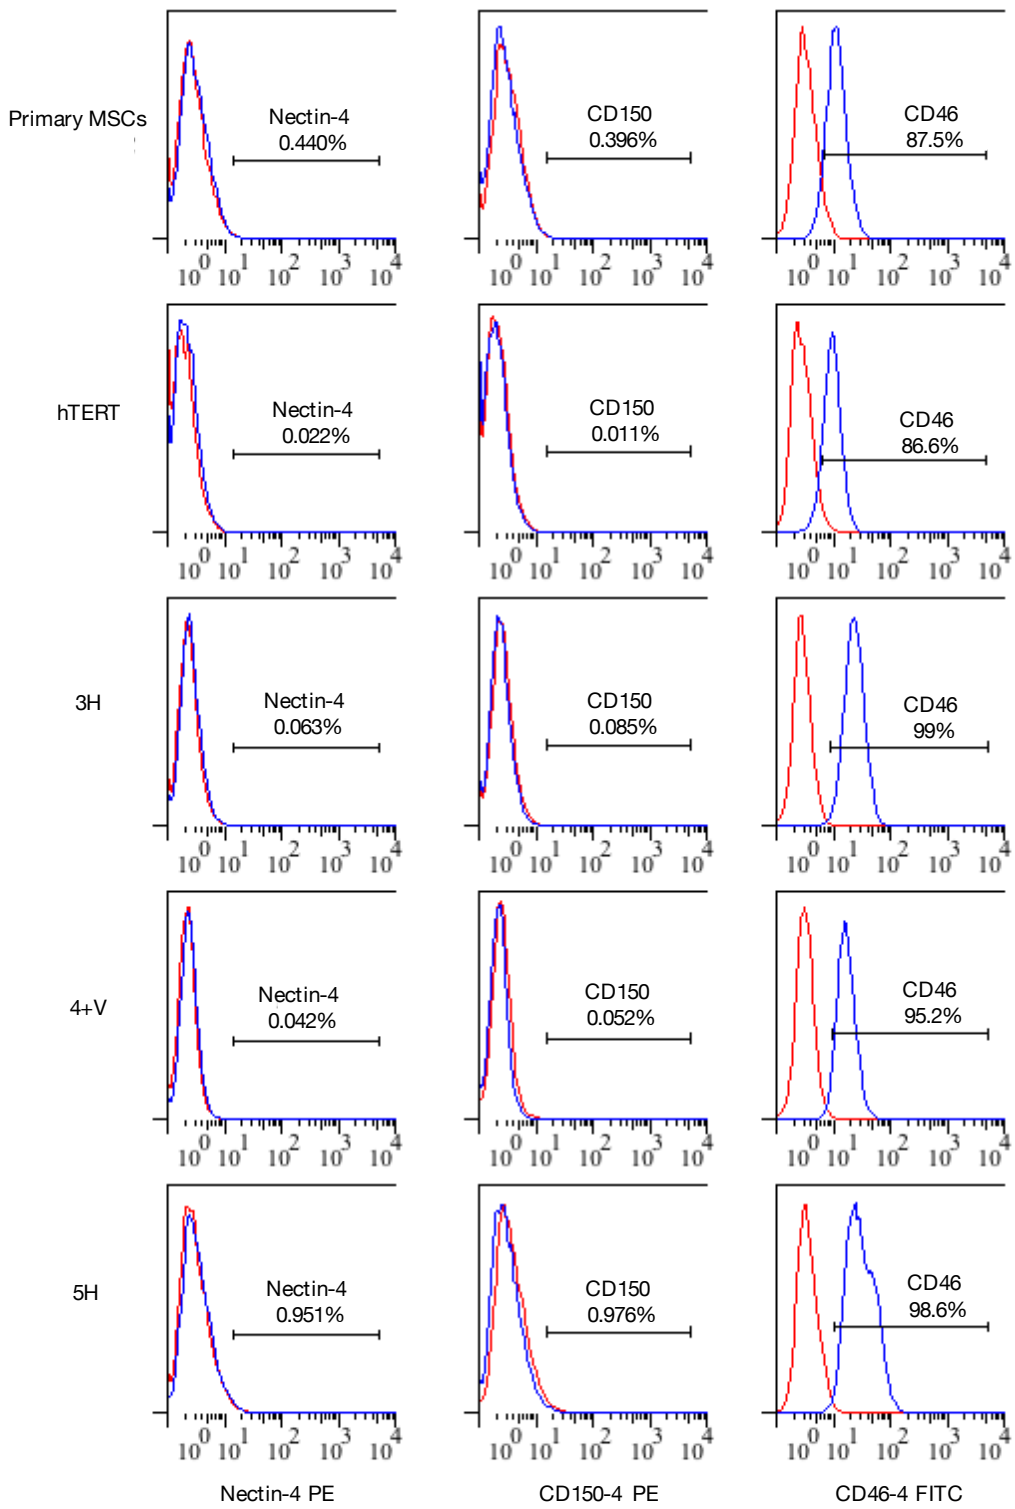

**B**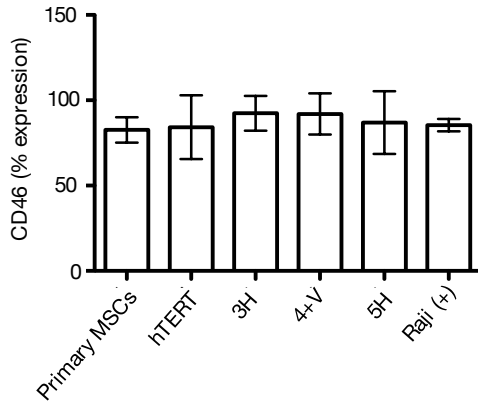**C**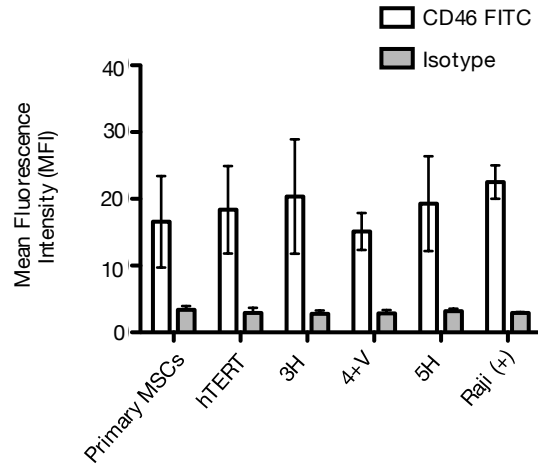

**Figure S2 MSC MV receptor expression profiles.** (A) Representative flow cytometry histograms showing the percent age of cell surface expression of MV receptors CD46, CD150/SLAM and nectin-4 in transformed MSCs. Isotype-stained cells were used as negative controls. (B) Cumulative CD46 expression data and (C) corresponding mean fluorescent intensities (MFIs) for MSCs. Raji cells were used as a positive control for CD46 expression. Data shown is the mean SEM for 5 independent experiments.

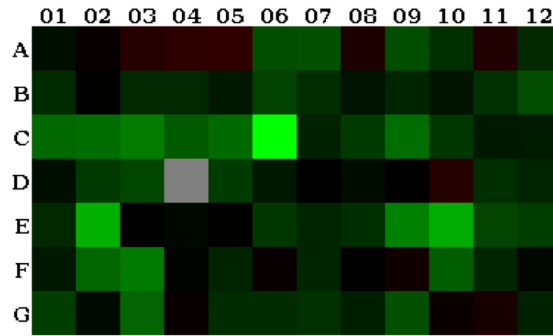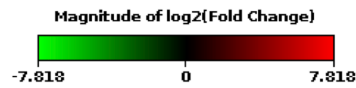

| Layout | 01                 | 02                   | 03                  | 04                  | 05                  | 06                 | 07                   | 08                | 09                    | 10                  | 11                  | 12                 |
|--------|--------------------|----------------------|---------------------|---------------------|---------------------|--------------------|----------------------|-------------------|-----------------------|---------------------|---------------------|--------------------|
| A      | ADAR<br>-1.34      | BAG3<br>1.21         | BST2<br>2.11        | CASP1<br>2.54<br>A  | CAV1<br>2.66        | CCL2<br>-5.34<br>B | CCL5<br>-5.39        | CD70<br>1.79<br>A | CD80<br>-5.35<br>A    | CD86<br>-2.65<br>B  | CDKN1B<br>1.95      | CIITA<br>-2.34     |
| B      | CRP<br>-2.43<br>B  | CXCL10<br>-1.02<br>B | DDX58<br>-2.36      | EIF2AK2<br>-2.33    | GBP1<br>-1.70       | HLA-A<br>-4.09     | HLA-B<br>-2.56       | HLA-E<br>-1.45    | HLA-G<br>-2.23        | IFI16<br>-1.54      | IFI27<br>-2.79      | IFI30<br>-5.10     |
| C      | IFI6<br>-9.24      | IFIH1<br>-10.23      | IFIT1<br>-13.80     | IFIT2<br>-6.90      | IFIT3<br>-9.65      | IFITM1<br>-225.62  | IFITM2<br>-2.06      | IFITM3<br>-3.41   | IFNA1<br>-10.35       | IFNA2<br>-3.14<br>B | IFNA4<br>-1.56<br>B | IFNAR1<br>-1.71    |
| D      | IFNAR2<br>-1.34    | IFNB1<br>-3.36<br>B  | IFNE<br>-4.49       | IFNW1<br>-1.86<br>C | IL10<br>-3.62<br>B  | IL15<br>-1.63      | IL6<br>1.01          | IRF1<br>-1.28     | IRF2<br>1.02          | IRF3<br>2.24        | IRF5<br>-2.61<br>B  | IRF7<br>-2.16<br>B |
| E      | IRF9<br>-2.32      | ISG15<br>-43.19      | ISG20<br>1.04       | JAK1<br>-1.19       | JAK2<br>-1.05       | MAL<br>-3.11<br>B  | MET<br>-2.19         | MNDA<br>-2.62     | MX1<br>-15.76<br>A    | MX2<br>-38.09<br>A  | MYD88<br>-4.17      | NMI<br>-3.68       |
| F      | NOS2<br>-1.66<br>B | OAS1<br>-8.92        | OAS2<br>-13.46<br>A | PML<br>-1.07        | PRKCZ<br>-2.18<br>B | PSME2<br>1.18      | SH2D1A<br>-2.22<br>B | SHB<br>-1.00      | SOCS1<br>1.40         | STAT1<br>-7.46      | STAT2<br>-2.24      | STAT3<br>-1.14     |
| G      | TAP1<br>-3.80      | TICAM1<br>-1.22      | TIMP1<br>-8.29      | TLR3<br>1.17<br>B   | TLR7<br>-2.42<br>B  | TLR8<br>-2.39<br>B | TLR9<br>-2.77<br>B   | TMEM173<br>-1.92  | TNFSF10<br>-5.57<br>A | TRAF3<br>1.25       | TYK2<br>1.76<br>A   | VEGFA<br>-2.02     |

**Figure S3 Heat map of genes differentially expressed between hTERT and 5H MSCs.** After being normalized against house-keeping genes, the average delta Ct values of target genes were compared between hTERT and 5H cells at baseline ( $n=3$ ) and presented as fold regulation. This heat map shows the range of the fold regulations. Data were analysed using RT<sup>2</sup> profiler PCR array data analysis.

| Position | Gene Symbol | Fold Regulation | p-Value  |
|----------|-------------|-----------------|----------|
| C06      | IFITM1      | -225.62         | 0.044523 |
| E10      | MX2         | -38.09          | 0.002336 |
| E09      | MX1         | -15.76          | 0.049148 |
| F03      | OAS2        | -13.46          | 0.036223 |
| C09      | IFNA1       | -10.35          | 0.014486 |
| C05      | IFIT3       | -9.65           | 0.038361 |
| F02      | OAS1        | -8.92           | 0.004198 |
| G03      | TIMP1       | -8.29           | 0.005028 |
| F10      | STAT1       | -7.46           | 0.006393 |
| C04      | IFIT2       | -6.90           | 0.036567 |
| G09      | TNFSF10     | -5.57           | 0.001976 |
| D03      | IFNE        | -4.49           | 0.017604 |
| H02      | B2M         | -4.11           | 0.009224 |
| C08      | IFITM3      | -3.41           | 0.029079 |
| E08      | MNDA        | -2.62           | 0.036293 |
| A12      | CIITA       | -2.34           | 0.031149 |
| B04      | EIF2AK2     | -2.33           | 0.039561 |
| B09      | HLA-G       | -2.23           | 0.036003 |

**Table S1 Genes significantly downregulated in 5H MSC compared to hTERT MSCs.** List of genes significantly downregulated in 5H cells compared to hTERT cells ( $p < 0.05$ ). Data were analysed using RT<sup>2</sup> profiler PCR array data analysis.
